# Supplementary material for: Interaction of Vibration and Air Flow-Accelerating Droplet Emission from the Gas Diffusion Layer of Proton Exchange Membrane Fuel Cell
Source: Hindawi journal article supplement (doi:10.1155/2019/1674134), 2019-12-10
Supplement: f1 [file 1674134.f1.pdf]

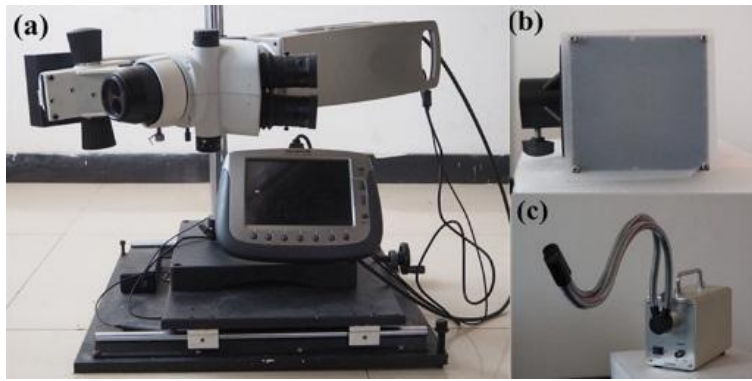

Fig. S1 The photographs of high-speed camera and light source

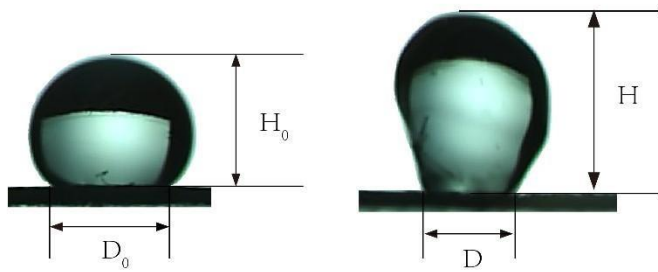

Fig. S2 The contact line and contact height of droplet before and after vertical vibration

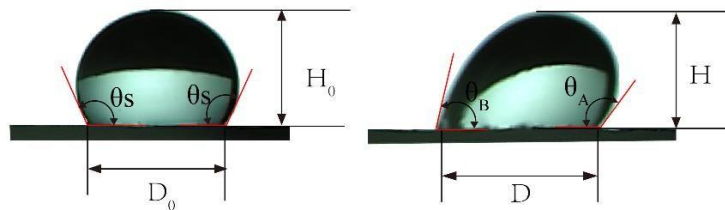

Fig. S3 The contact line and contact height of droplet before and after horizontal vibration
